# Supplementary material for: A fair individualized polysocial risk score for identifying increased social risk in type 2 diabetes
Source: PubMed Central journal article supplement — Nat Commun. 2024 Oct 5;15:8653. doi: 10.1038/s41467-024-52960-9 (PMC11455957; doi:10.1038/s41467-024-52960-9), 2024-10-05
Supplement: 41467_2024_52960_MOESM3_ESM.pdf [file 41467_2024_52960_MOESM3_ESM.pdf]

## **Description of Additional Supplementary Files**

Supplementary Data 1. Summary of contextual-level SDoH

Supplementary Data 2. Overall performance (AUROC) for T2D hospitalization prediction on the independent testing set

Supplementary Data 3. Bootstrapping Prediction performance for different feature sets by random under sampling

Supplementary Data 4. Model Fairness Assessment

Supplementary Data 5. Model Prediction Performance Assessment

Supplementary Data 6. Baseline Performance Assessment

Supplementary Data 7. Fairness Mitigation Results

Supplementary Data 8. HyperParameters
